# Supplementary material for: The ethanol mediated-CeO2-supported low loading ruthenium catalysts for the catalytic wet air oxidation of butyric acid
Source: Royal Society of Chemistry journal article supplement (doi:10.1039/c7ra06028a), 2017-01-01
Supplement: c7ra06028a1.pdf [file c7ra06028a1.pdf]

## Supporting information

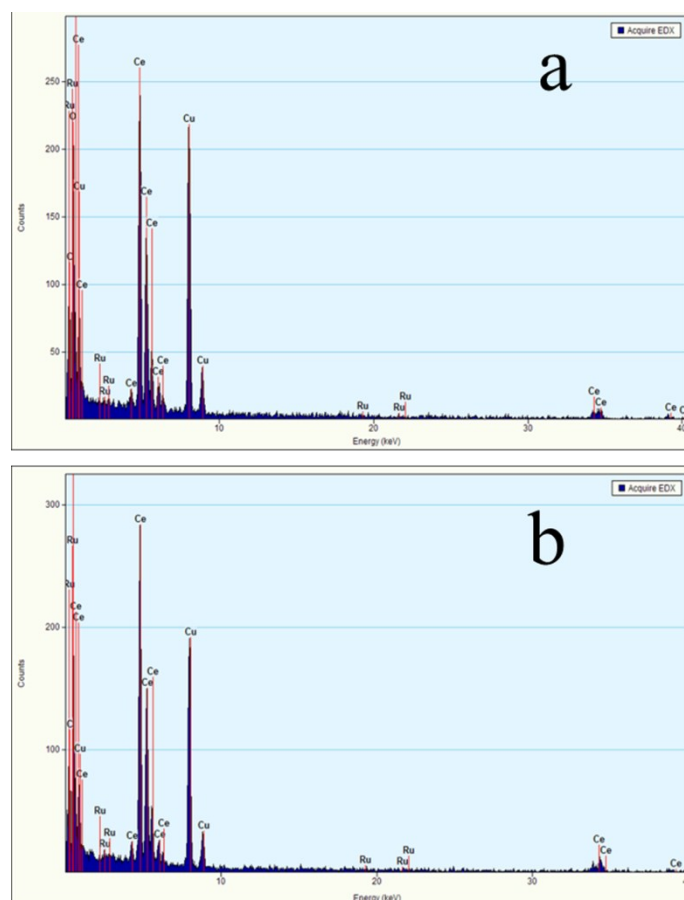

Fig. S1. The EDX images of (a) Ru/CeO<sub>2</sub> and (b) Ru/CeO<sub>2</sub>-A.

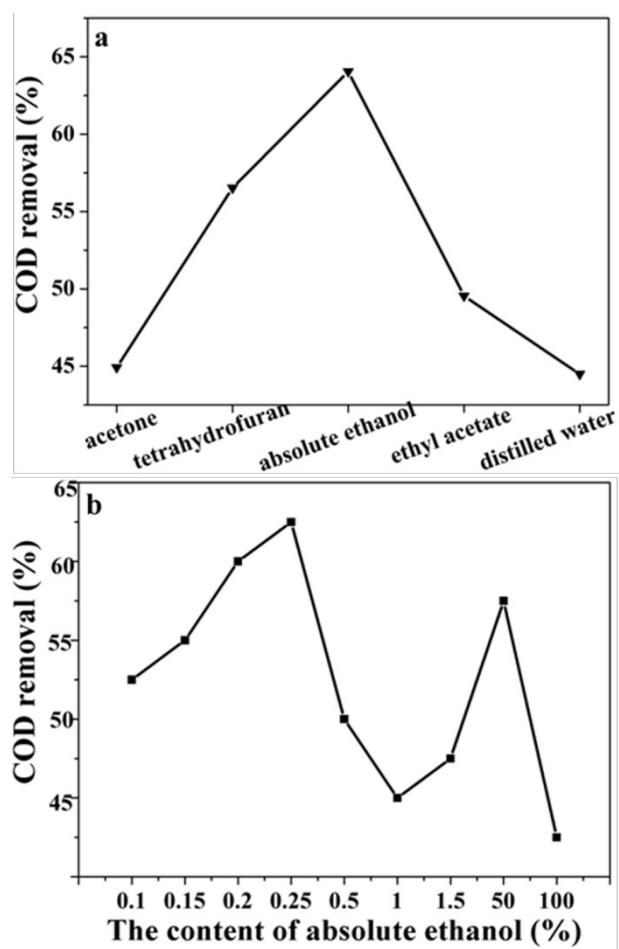

Fig.S2 The COD removal under the Ru/CeO<sub>2</sub> catalyst mediated by (a) different solvent and (b) different content of absolute ethanol.
